# Supplementary material for: Synonym set extraction from the biomedical literature by lexical pattern discovery
Source: Springer Nature journal article supplement (doi:10.1186/1471-2105-9-159), 2008-03-24
Supplement: 12859_2007_2144_MOESM1_ESM.pdf [file 12859_2007_2144_MOESM1_ESM.pdf]

# \* \* #

# also \* #

#, \* \* #

# known \* #

# also called #

#, known \* #

# known as #

#, known as #
