# Supplementary material for: Synonym set extraction from the biomedical literature by lexical pattern discovery
Source: Springer Nature journal article supplement (doi:10.1186/1471-2105-9-159), 2008-03-24

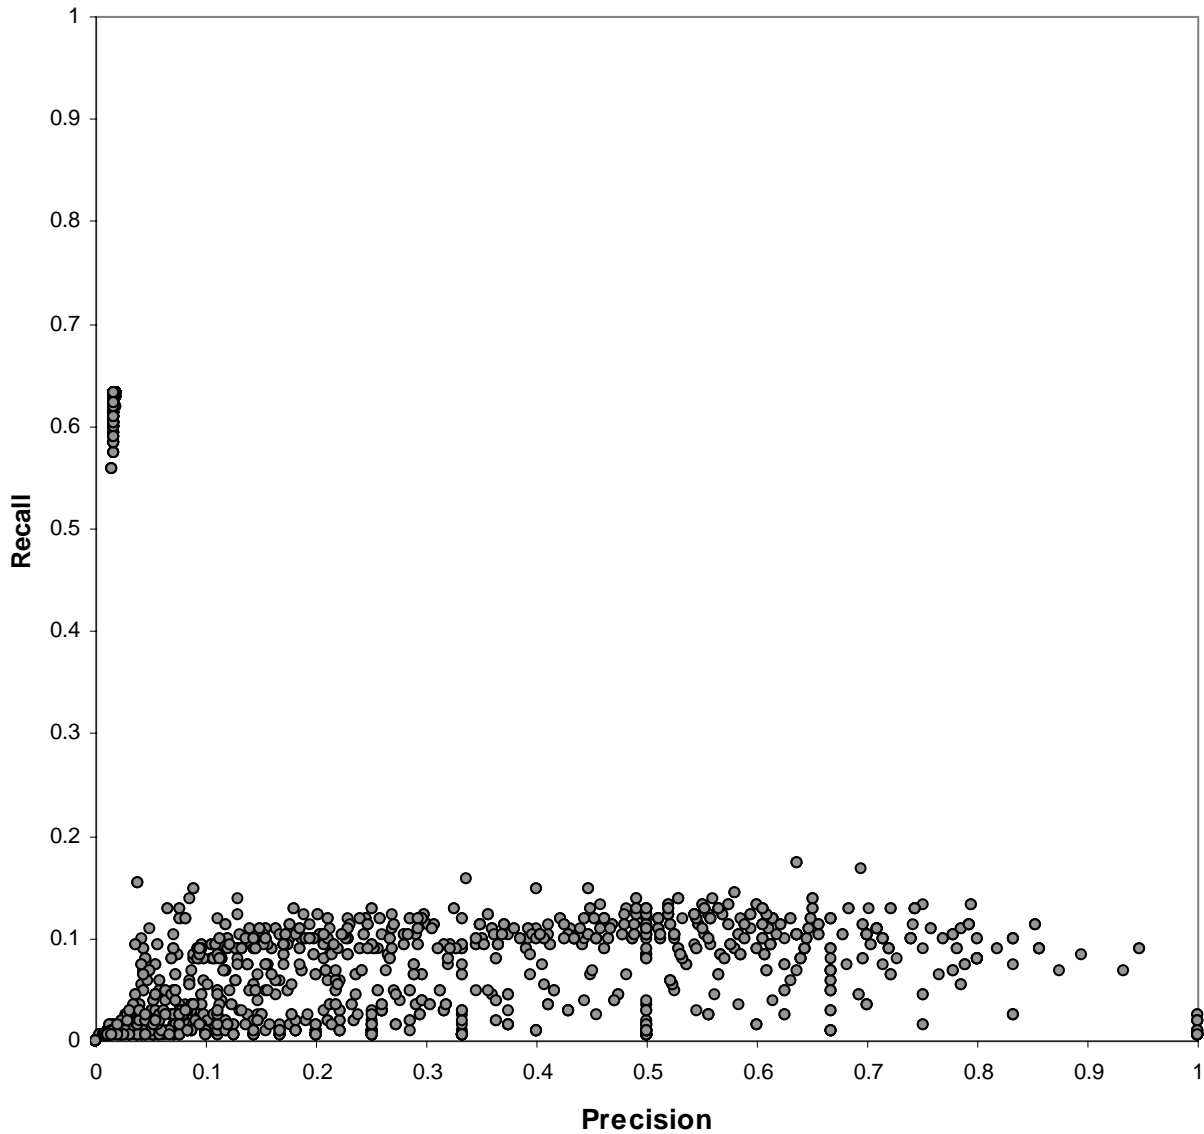

Supplement: 12859_2007_2144_MOESM3_ESM.pdf [file 12859_2007_2144_MOESM3_ESM.pdf]
